# Supplementary material
Source: PubMed Central journal article supplement (PMC7681032)
Supplement: supp_RA120.014615_161199_2_supp_598104_qgrcr6.pdf [file supp_RA120.014615_161199_2_supp_598104_qgrcr6.pdf]

## SUPPORTING INFORMATION

### E3 ubiquitin ligase PARK2, an inhibitor of melanoma cell growth, is repressed by the oncogenic ERK1/2-ELK1 transcriptional axis

Valentina Montagnani<sup>1</sup>, Luisa Maresca<sup>1</sup>, Alessandro Apollo<sup>1§</sup>, Sara Pepe<sup>1,2</sup>, Ryan M. Carr<sup>3</sup>, Martin E. Fernandez-Zapico<sup>3</sup>, Barbara Stecca<sup>1\*</sup>

#### Supplementary Figure Legends

**Supplementary Figure 1.** Kaplan-Meier progression free survival (left) and overall survival (right) curves in metastatic melanoma patients from the TCGA cohort (n=24). Patients were stratified into two groups based on high (> 4.587) and low (< 4.587) *PARK2* expression values.

**Supplementary Figure 2.** *PARK2* is negatively modulated by the RAS-RAF-MEK1/2-ERK1/2 signaling pathway. Western blot analysis of *PARK2* and pERK1/2 in 501-Mel melanoma cells treated with vemurafenib (A) or SCH-772984 (B) for the indicated time. HSP90 was used as loading control.

**Supplementary Figure 3.** *PARK2* expression is negatively modulated by EGF. qPCR analysis of *Cyclin D1* (A), *c-Fos* (B) and *PARK2* (C) in HEK-293T cells treated with EGF (20ng/ml) for the indicated time. The y axis represents expression ratio of gene/(*GAPDH* and  $\beta$ -*ACTIN* average), with control equated to 1. Data shown are mean  $\pm$  s.e.m. of at least three biological replicates, each performed in triplicate.

**Supplementary Figure 4.** Sequence of *PARK2* promoter. The position of ELK1 binding site is highlighted in green, sequences of primers for ChIP are in bold. Primers for mutagenesis of the ELK1 binding site are reported.

**Supplementary Figure 5.** ELK1 negatively modulates the expression of *PARK2*. **A.** Chromatin immunoprecipitation (ChIP) assay showing that exogenous ELK1 binds to *PARK2* promoter in HEK-293T cells transfected as indicated. Two different specific anti-ELK1 antibodies were used. **B.** ChIP assay showing that silencing of ELK1 reduces the binding to *PARK2* promoter in A375 cells transfected as indicated. The y-axis represents the relative promoter enrichment, normalized on the input material. IgG was used as negative control and set to 1. **C.** Expression of *ELK1* and *PARK2* mRNA by qPCR in A375 cells transfected as indicated. The y axis represents expression ratio of gene/(*GAPDH* and  $\beta$ -*ACTIN* average), with the level of control equated to 1. **D.** Western blot (WB) analysis of *PARK2* and ELK1 in A375 cells transfected as indicated. HSP90 was used as loading control. **E.** Expression of *PARK2* and *ELK1* mRNA by qPCR in SK-Mel-5 cells transfected as indicated. The y axis represents expression ratio of gene/(*GAPDH* and  $\beta$ -*ACTIN* average), with control equated to 1. **F.** WB analysis of *PARK2* and ELK1 in SK-Mel-5 cells transfected as indicated. HSP90 was used as loading control. **G.** qPCR analysis of *PARK2* and *ELK1* mRNA in HEK-293T cells overexpressing empty vector (pCAG) or ELK1. The y axis represents expression ratio of gene/(*GAPDH* and  $\beta$ -*ACTIN* average), with control equated to 1. **H.** WB analysis of *PARK2* and ELK1 in HEK-293T cells transfected as indicated. HSP90 was used as loading control. Data shown are mean  $\pm$  s.d. (A, B) or mean  $\pm$  s.e.m. (C, E, G) of at least three biological replicates, each performed in triplicate. \*, p<0.05; \*\*, p<0.01.

**Supplementary Figure 6.** ELK1 negatively modulates the expression of *PARK2* in glioblastoma and breast cancer cells. **A-B.** Expression of *PARK2* and *ELK1* mRNA by qPCR in U87MG (HTB-14) glioblastoma and MCF7 (HTB-22) breast cancer cell lines transiently transfected with empty vector (pCAG) or pELK1. Both cell lines were grown in EMEM supplemented with 10% fetal bovine serum (FBS), 1% Penicillin-streptomycin, 2 mM L-Glutamine (Lonza, Basel, Switzerland). The y axis represents expression ratio of gene/(*GAPDH* and  $\beta$ -*ACTIN* average), with control equated to 1. **C.** Western blot analysis of endogenous *PARK2* in U87MG and MCF7 cell lines transiently transfected as indicated. HSP90 was used as loading control. Data shown are mean  $\pm$  s.e.m. of at least three biological replicates, each performed in triplicate. \*\*, p<0.01.

**Supplementary Figure 7.** Overexpression of PARK2 reduces melanoma cell growth and increases apoptosis. **A.** Western blot (WB) analysis of PARK2 in 501-Mel and SK-Mel-28 melanoma cells transduced with pBABE or PARK2. HSP90 was used as loading control. **B-C.** Growth curves in 501-Mel and SK-Mel-28 transduced as indicated. **D-E.** Histogram of the quantification of colony assay in 501-Mel and SK-Mel-28 cells transduced as indicated. **F-G.** 501-Mel and SK-Mel-28 melanoma cells transduced as indicated, were subjected to cytometric analysis of apoptotic cells after staining with Annexin V/7-AAD (Annexin V+/7-AAD<sup>-</sup>: early apoptosis; Annexin V+/7-AAD<sup>+</sup>: late apoptosis). **H.** WB analysis of BCL-2 and BCL-XL in 501-Mel and SK-Mel-28 transduced as described. HSP90 was used as loading control. **I.** Western blot analysis of pAKT in melanoma cell lines transduced as indicated. HSP90 was used as loading control. Protein quantifications are indicated in *italic*. Data shown are mean  $\pm$  s.d. of at least three biological replicates, each performed in triplicate. \*,  $p < 0.05$ ; \*\*,  $p < 0.01$ .

**Supplementary Figure 8.** PARK2 depletion increases melanoma cell growth reducing apoptosis. **A.** Western blot (WB) analysis of PARK2 in M51 melanoma cells transduced with LV-c, LV-shPARK2-1 or LV-shPARK2-2. HSP90 was used as loading control. **B.** Growth curves in M51 cells transduced as indicated. **C.** M51 melanoma cells transduced as indicated, were subjected to cytometric analysis of apoptotic cells after staining with Annexin V/7-AAD (Annexin V+/7-AAD<sup>-</sup>: early apoptosis; Annexin V+/7-AAD<sup>+</sup>: late apoptosis). **D.** WB analysis of Caspase-3 and BCL-2 in M51 cells transduced as indicated. HSP90 was used as loading control. **E.** WB analysis of pAKT in melanoma cells transduced as indicated. HSP90 was used as loading control. Protein quantifications are indicated in *italic*. Data shown are mean  $\pm$  s.d. of at least three biological replicates, each performed in triplicate. \*,  $p < 0.05$ .

**Progression Free Survival**

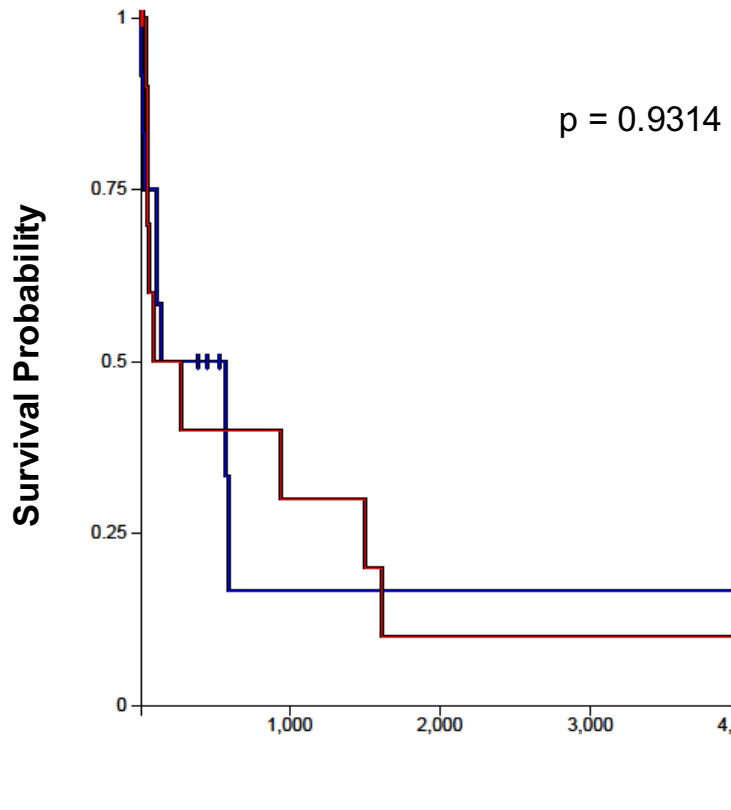

**Overall Survival**

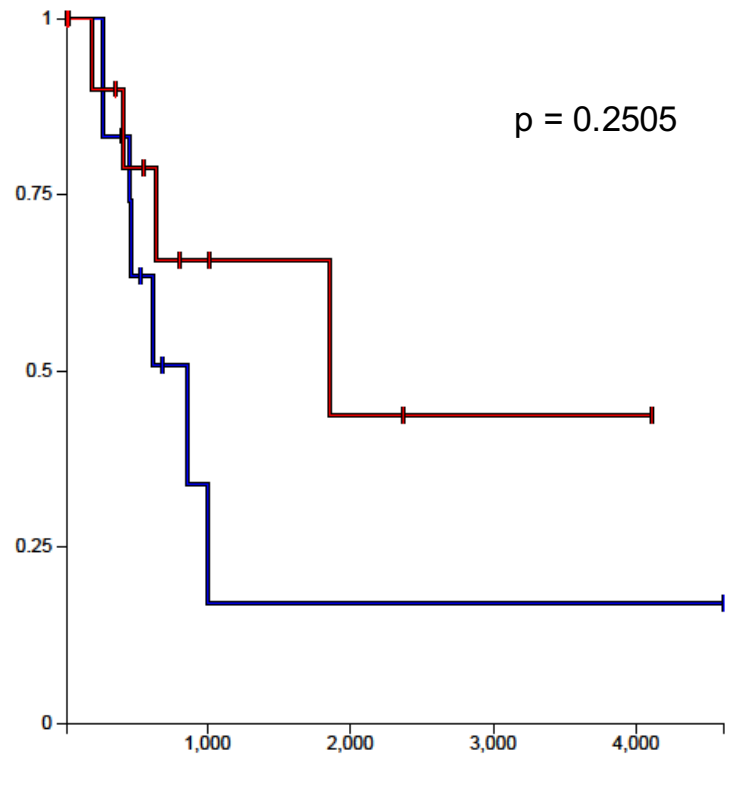

**PARK2 Expression**

- $\geq 4.587$  (n=12)
- $< 4.587$  (n=12)

Supplementary Figure 1

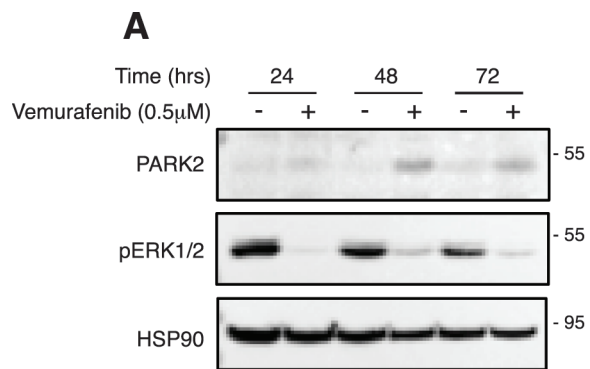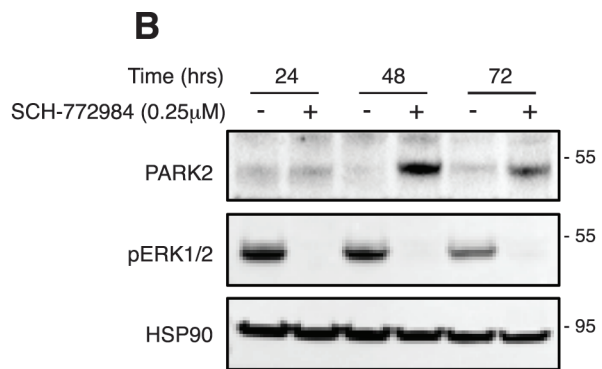

Supplementary Figure 2

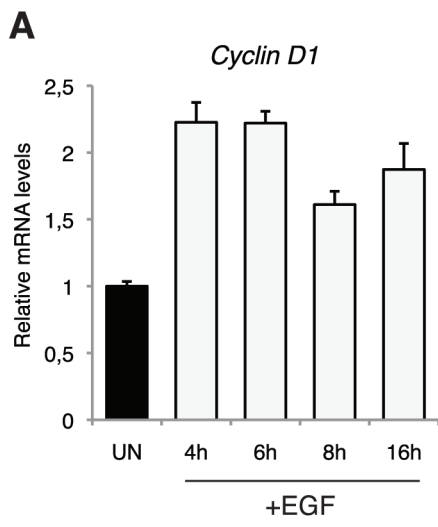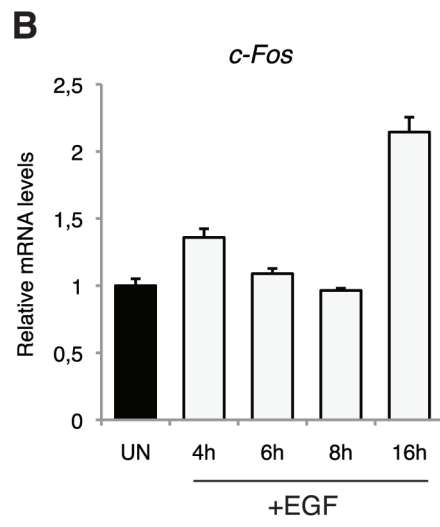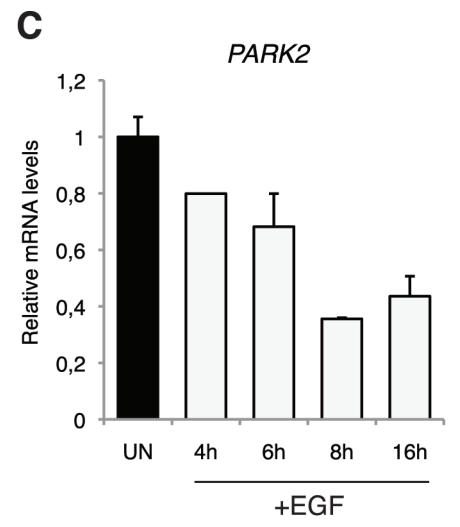

Supplementary Figure 3

## **PARK2 promoter sequence**

chr6:162727669-162728401 GRCh38/hg38 (-635 +98 from TSS)

GATCACTTACGACTGAGTTTTTTCATCATGGCTTTGACTGTGAAACCCTCA  
GAAACCAGAGAGTGAGGCTGGTGCACCGGGAGCGGCTGTTGTGCCAGCAG  
CTTGGTCCTCTTCGGCATCTTGTCTGGGCATTTGTTTAAGCTCAGGGTCT  
CTTTTTCTGCCACCATCTTCCTAGAAAATGTCTTGTTCATAAAAAGTG  
TAGTAAAAGAATCAGTGGGCTTTACGGATGTGAGCAGGAGGTCTGGAAAA  
AAATATCAAAAGGCGCGATAATGGTAGAAATTCAACCCCTCGTAGTGCCC  
AGGTTGATCCAGATGTTTGGCAGCTCCTAGGTGAAGGGAGCTGGACCCTA  
GGGGCGGGGCGGGAAGAGGGCAGGACCTTGGCTAGAGCTGCAACAAGCTT  
CCAAAGGTAAGCCTCCCGGTT**GCTAAGCGACTGGTCAACAC**GGGCGGC  
ATAGCCCCGCCCCCGGTGACGTAAGATTGCTGGGCTGAAG**CCGGAAA**G  
GGCGGCGGTGGGGGGCTGGGGGCAGGAGGCGT**GAGGAGAACTACGCGTT**  
AGA**ACTACGACT**CCCAGCAGGCCCTGGGCCGCGCCCTCCGCGCGTGCGCA  
TTCCTAGGGCCGGGCGCGGGGGCGGGGAGGCCTGG**AGG**ATTTAACCCAGG  
AGAGCCGCTGGTGGGAGGCGCGGCTGGCGCCGCTGCGCGCATGGGCCTGT  
TCCTGGCCCGCAGCCGCCACCTACCCAGTGACC

**CCGGAAA** ELK1 binding site (BS) -143 from TSS

AGG Start TSS

**Bold:** primers used for ChIP

| <b>Primers (ChIP)</b> | <b>Sequence (5'-&gt;3')</b> |
|-----------------------|-----------------------------|
| PARK2chip F2          | GCTAAGCGACTGGTCAACAC        |
| PARK2chip R2          | AACGCGTAGTTTCTCCTCACG       |

CCCCAA mut ELK1 binding site (BS) -143 from TSS

| <b>Primers (Mutagenesis)</b> | <b>Sequence (5'-&gt;3')</b>     |
|------------------------------|---------------------------------|
| PARK2prom FW mut1            | CTGGGCCTGAAGCCCCCAAGGGCGGCGGTGG |
| PARK2prom RV mut1            | CCACCGCCGCCCTTGGGGGCTTCAGGCCAG  |

Supplementary Figure 4

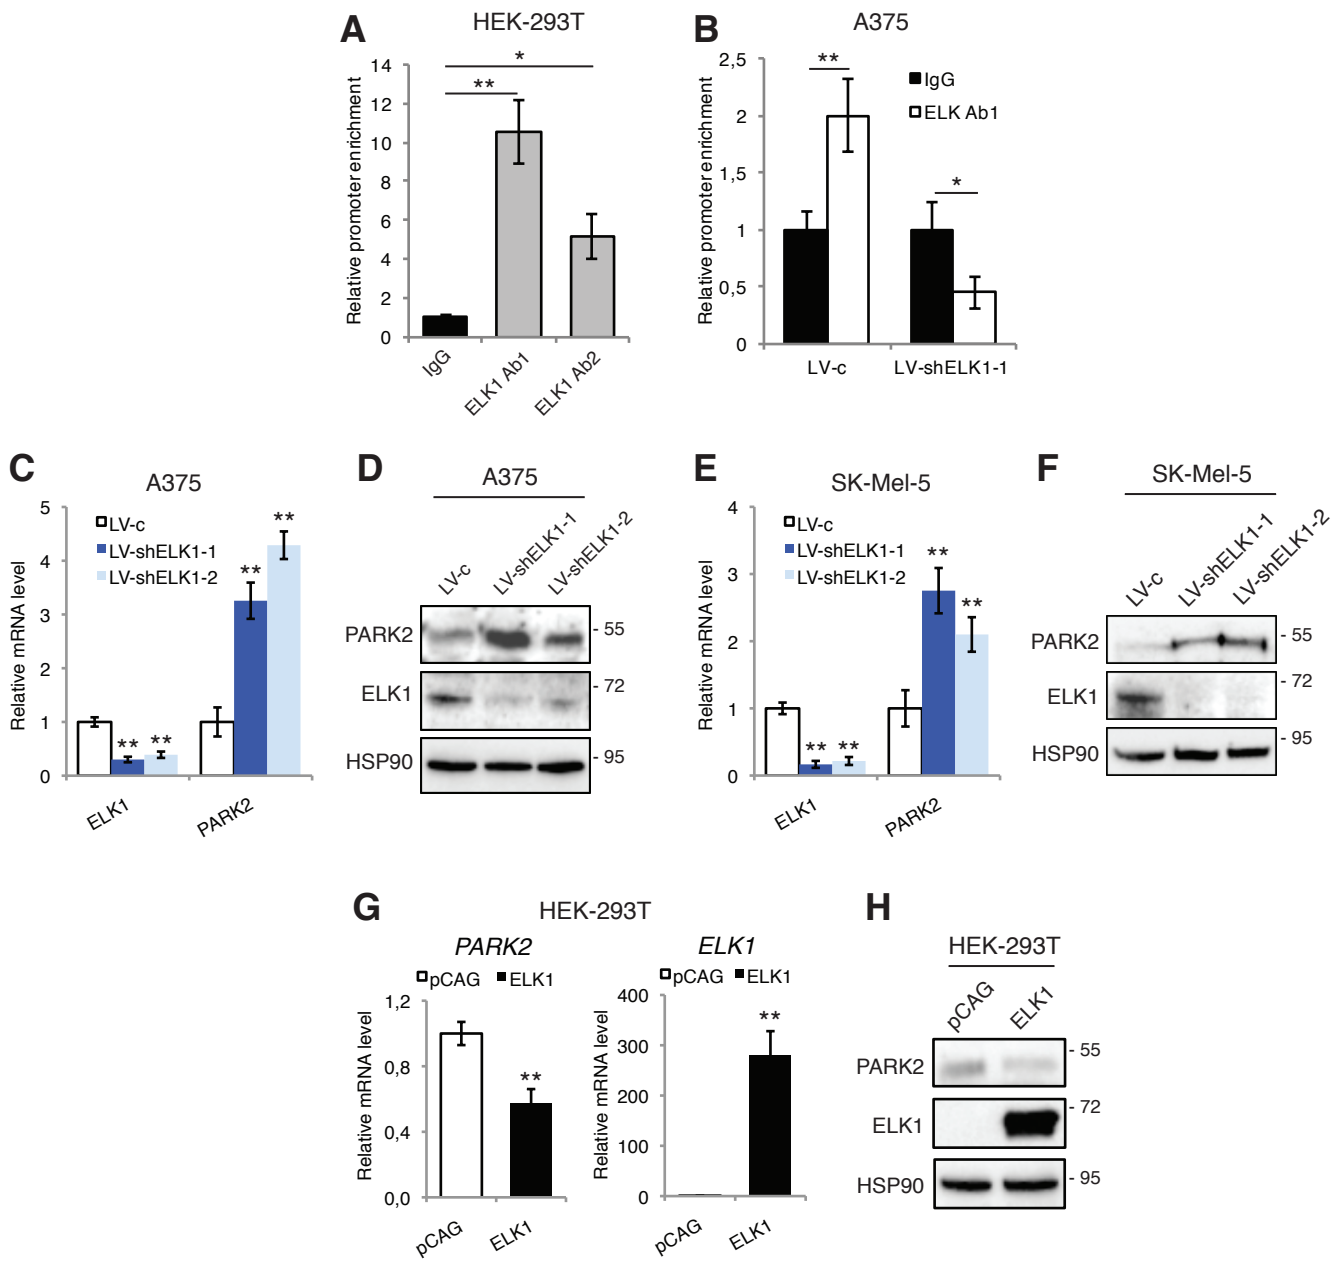

Supplementary Figure 5

**A**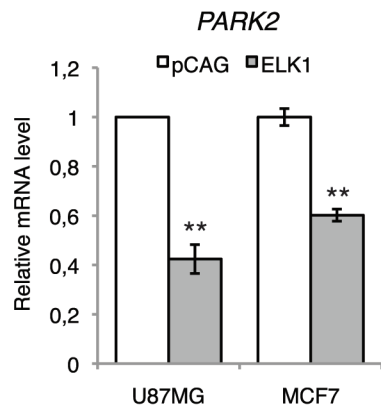**B**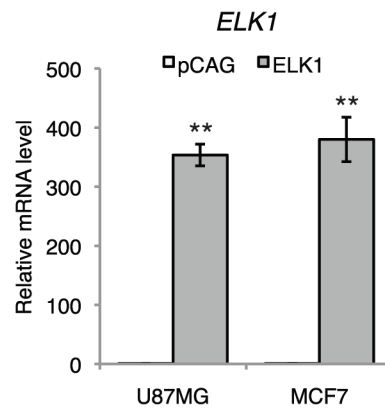**C**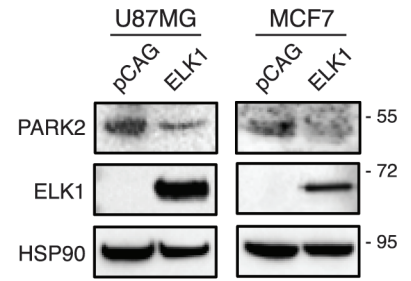

Supplementary Figure 6



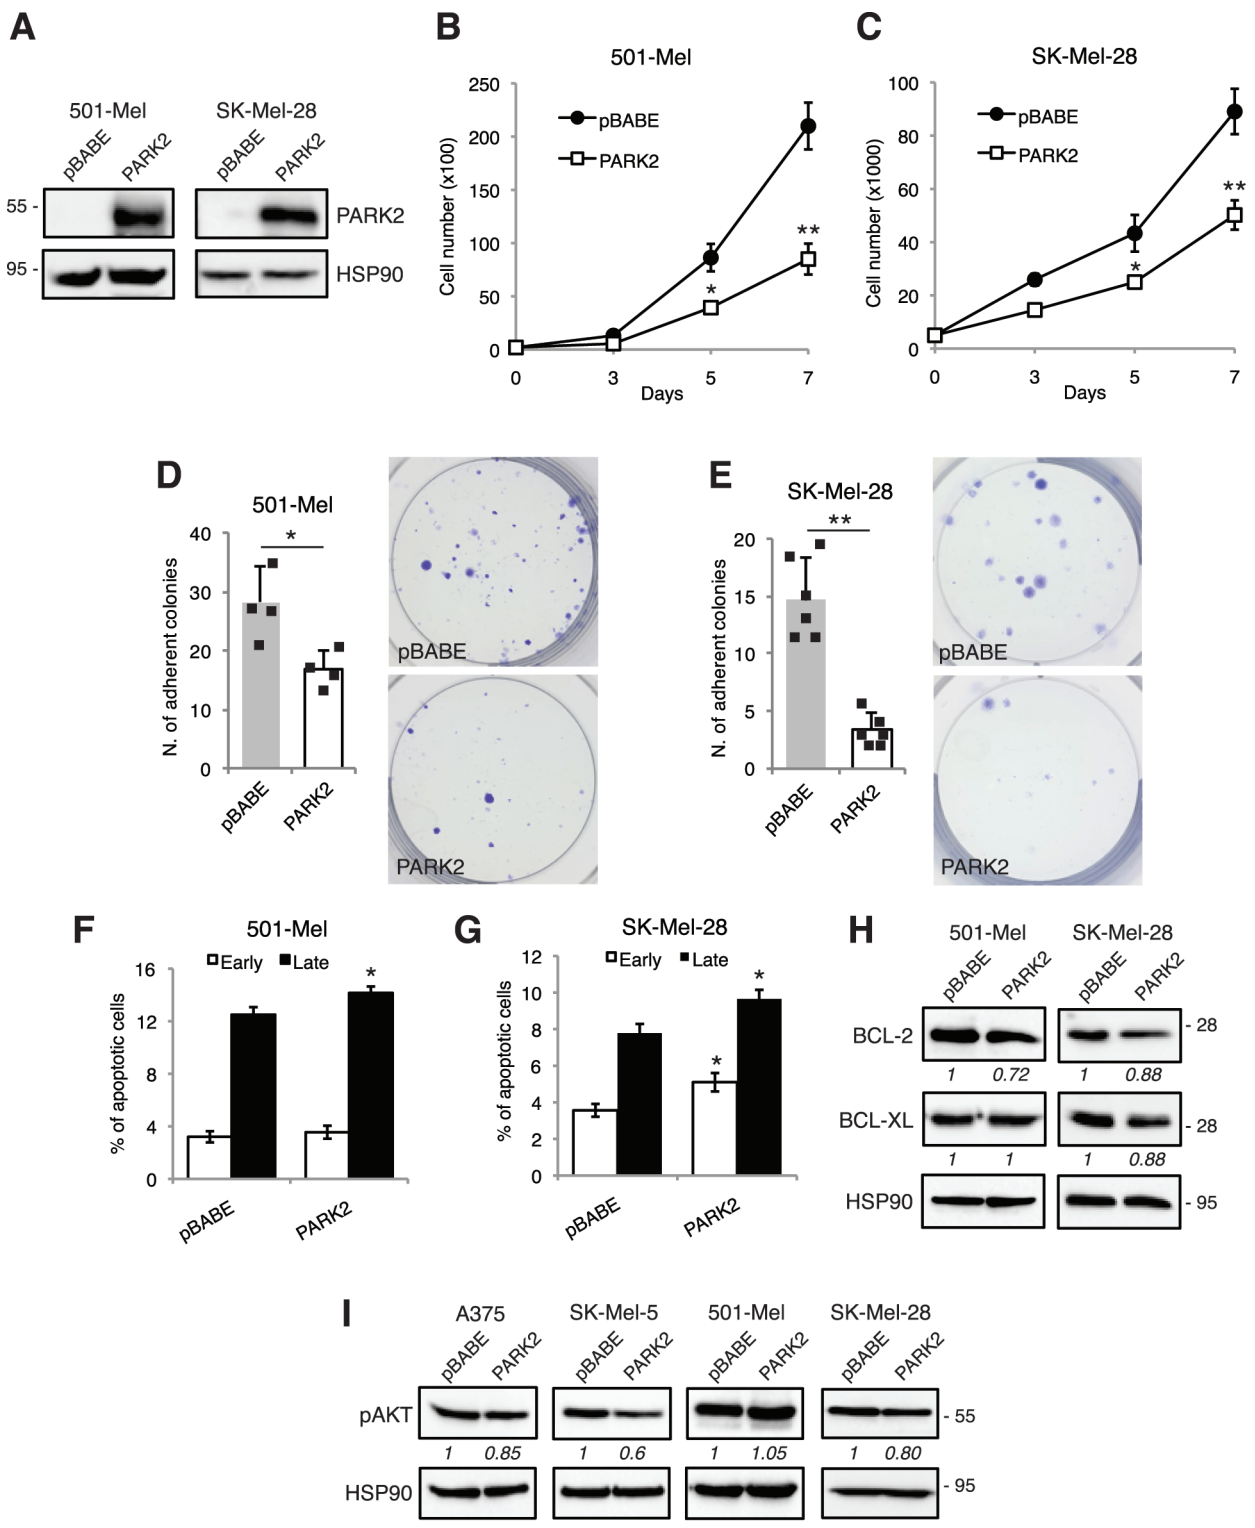

Supplementary Figure 7

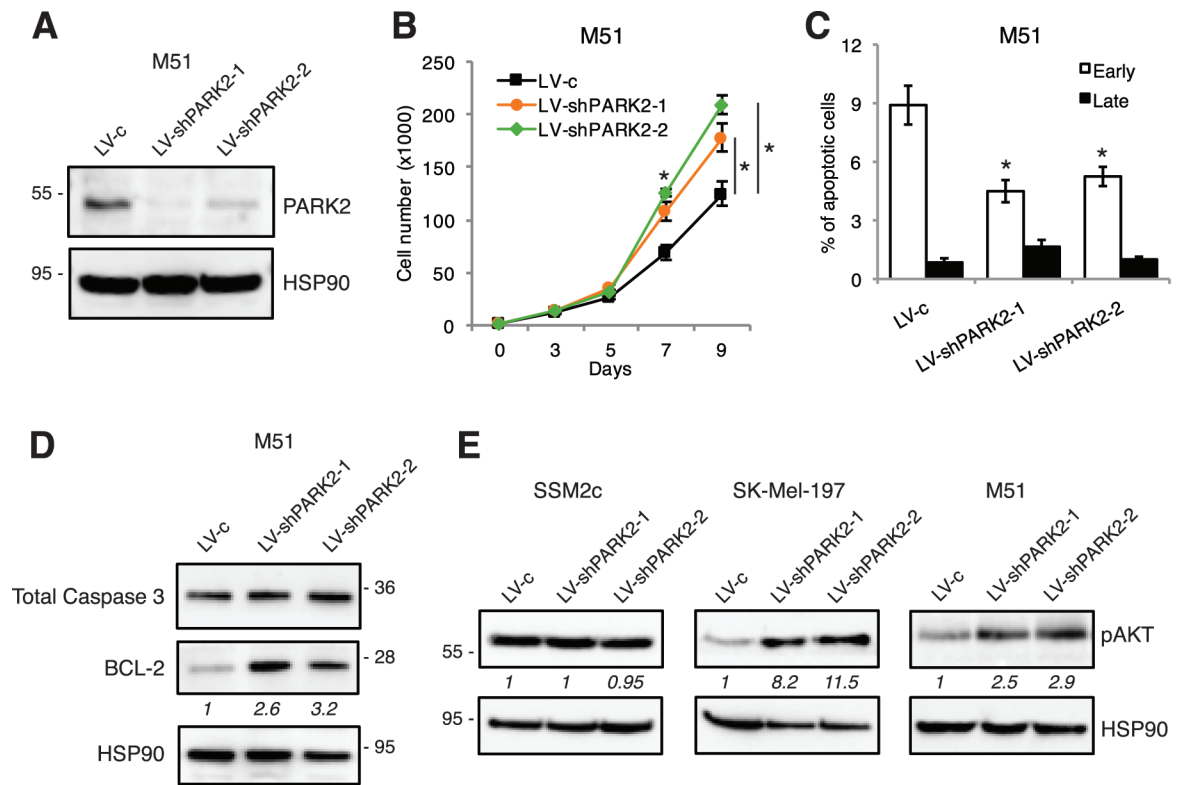

Supplementary Figure 8
